# Supplementary material for: Perceived sounds and their reported level of disturbance in intensive care units: A multinational survey among healthcare professionals
Source: PubMed Central journal article supplement (PMC9803129; doi:10.1371/journal.pone.0279603), 2022-12-30
Supplement: pone.0279603.s001.pdf [file pone.0279603.s001.pdf]

**Table S1. Hospital data according to country.**

| <b>Hospital data<sup>a</sup></b>           | <b>Germany</b><br>37.4% ( <i>n</i> = 131) | <b>Switzerland</b><br>32.0% ( <i>n</i> = 112) | <b>Austria</b><br>30.6% ( <i>n</i> = 107) |
|--------------------------------------------|-------------------------------------------|-----------------------------------------------|-------------------------------------------|
| <b>Type of hospital</b>                    |                                           |                                               |                                           |
| Public <sup>b</sup> or university          | 80.2% (105)                               | 89.3% (100)                                   | 97.2% (104)                               |
| Private                                    | 17.6% (23)                                | 8.0% (9)                                      | 0.9% (1)                                  |
| Not specified or missing                   | 2.3% (3)                                  | 2.7% (3)                                      | 1.9% (2)                                  |
| <b>Type of unit</b>                        |                                           |                                               |                                           |
| Intensive care unit (ICU)                  | 66.4% (87)                                | 81.3% (91)                                    | 77.6% (83)                                |
| Intermediate care (IMC)                    | –                                         | 7.1% (8)                                      | 4.7% (5)                                  |
| No clear separation                        | 33.6% (44)                                | 11.6% (13)                                    | 15.9% (17)                                |
| Not specified or missing                   | –                                         | –                                             | 1.9% (2)                                  |
| <b>Specialisation of unit</b>              |                                           |                                               |                                           |
| Mixed                                      | 70.2% (92)                                | 75.9% (85)                                    | 51.4% (55)                                |
| Surgical                                   | 13.0% (17)                                | 5.4% (6)                                      | 27.1% (29)                                |
| Medical                                    | 6.9% (9)                                  | 8.9% (10)                                     | 12.1% (13)                                |
| Specialized                                | 7.6% (10)                                 | 4.5% (5)                                      | 7.5% (8)                                  |
| Not specified or missing                   | 2.3% (3)                                  | 5.4% (6)                                      | 1.9% (2)                                  |
| <b>Number of beds</b>                      |                                           |                                               |                                           |
| ≤ 20                                       | 67.9% (89)                                | 74.1% (83)                                    | 98.1% (105)                               |
| > 20                                       | 32.1% (42)                                | 25.9% (29)                                    | 1.9% (2)                                  |
| <b>Room type</b>                           |                                           |                                               |                                           |
| Mostly single-bed rooms                    | 21.4% (28)                                | 16.1% (18)                                    | 15.0% (16)                                |
| Mostly multi-bed rooms                     | 48.1% (63)                                | 68.8% (77)                                    | 73.8% (79)                                |
| Equal number of single and multi-bed rooms | 30.5% (40)                                | 15.2% (17)                                    | 11.2% (12)                                |

Hospital specifications separated for Germany, Switzerland, and Austria. Groups are presented as % (*n*), *n* represents the number of participants, and percentages were calculated based on the total sample size for each country.

<sup>a</sup> Not specified or missing data are displayed together, where ‘–’ indicates that no data is available

<sup>b</sup> Public hospitals contain also charitable hospitals
