# Supplementary material for: Perceived sounds and their reported level of disturbance in intensive care units: A multinational survey among healthcare professionals
Source: PubMed Central journal article supplement (PMC9803129; doi:10.1371/journal.pone.0279603), 2022-12-30
Supplement: pone.0279603.s002.pdf [file pone.0279603.s002.pdf]

**Table S2. Demographic data according to country.**

| <b>Demographic data<sup>a</sup></b> | <b>Germany<br/>37.4% (n = 131)</b>                     | <b>Switzerland<br/>32.0% (n = 112)</b>                 | <b>Austria<br/>30.6% (n = 107)</b>                     |
|-------------------------------------|--------------------------------------------------------|--------------------------------------------------------|--------------------------------------------------------|
| <b>Sex</b>                          |                                                        |                                                        |                                                        |
| Female                              | 64.9% (85)                                             | 67.9% (76)                                             | 67.3% (72)                                             |
| Male                                | 35.1% (46)                                             | 32.1% (36)                                             | 30.8% (33)                                             |
| Not specified or missing            | –                                                      | –                                                      | 1.9% (2)                                               |
| <b>Age</b>                          | <i>M ± SD =<br/>43.35 ± 11.80<br/>Range [21,63]</i>    | <i>M ± SD =<br/>43.59 ± 10.80<br/>Range [26,65]</i>    | <i>M ± SD =<br/>39.94 ± 11.53<br/>Range [21,62]</i>    |
| <b>Job</b>                          |                                                        |                                                        |                                                        |
| Nurse                               | 67.2% (88)                                             | 69.6% (78)                                             | 83.2% (89)                                             |
| Physician                           | 30.5% (40)                                             | 26.8% (30)                                             | 15.0% (16)                                             |
| Other job                           | 2.3% (3)                                               | 3.6% (4)                                               | 1.9% (2)                                               |
| <b>Employment</b>                   |                                                        |                                                        |                                                        |
| Full-time (100%)                    | 54.2% (71)                                             | 48.2% (54)                                             | 57.9% (62)                                             |
| Part-time (< 100%)                  | 45.0% (59)                                             | 51.8% (58)                                             | 36.5% (39)                                             |
| Not specified or missing            | 0.8% (1)                                               | –                                                      | 5.6% (6)                                               |
| <b>Work experience</b>              | <i>M ± SD =<br/>15.56 ± 10.41<br/>Range [0.5,40.0]</i> | <i>M ± SD =<br/>15.19 ± 10.18<br/>Range [0.5,38.0]</i> | <i>M ± SD =<br/>13.89 ± 10.92<br/>Range [0.5,40.0]</i> |

Participant demographics separated for German, Swiss, and Austrian healthcare professionals. Groups are presented as % (*n*), whereas *n* represents the number of participants, and percentages were calculated based on the total sample size for each country. Abbreviations: mean (M); standard deviation (SD).

<sup>a</sup> Not specified or missing data are displayed together, ‘–’ indicates that no data is available
