# Supplementary material for: Perceived sounds and their reported level of disturbance in intensive care units: A multinational survey among healthcare professionals
Source: PubMed Central journal article supplement (PMC9803129; doi:10.1371/journal.pone.0279603), 2022-12-30
Supplement: pone.0279603.s003.pdf [file pone.0279603.s003.pdf]

**Table S3. Perception of the sound level according to country.**

|                                        | <b>Germany</b><br><b>37.4%</b><br><b>(n = 131)</b> | <b>Switzerland</b><br><b>32.0%</b><br><b>(n = 112)</b> | <b>Austria</b><br><b>30.6%</b><br><b>(n = 107)</b> |                                   |               |                                |
|----------------------------------------|----------------------------------------------------|--------------------------------------------------------|----------------------------------------------------|-----------------------------------|---------------|--------------------------------|
| <b>Perception of sound<sup>a</sup></b> | <b><i>M ± SD</i></b>                               | <b><i>M ± SD</i></b>                                   | <b><i>M ± SD</i></b>                               | <b>Statistics<sup>b</sup></b>     | <b>95% CI</b> | <b>Effect size<sup>c</sup></b> |
| Perception of sound levels             | 3.98<br>(0.95)                                     | 3.79<br>(0.95)                                         | 4.04<br>(1.00)                                     | F(2) = 2.124,<br><i>p</i> = 0.121 | [0.00; 0.04]  | r =<br>0.35                    |
| 1) Devices and their alarms            | 2.72<br>(0.61)                                     | 2.64<br>(0.56)                                         | 2.63<br>(0.58)                                     | F(2) = 0.806,<br><i>p</i> = 0.447 | [0.00; 0.03]  | r =<br>0.10                    |
| 2) Short-lasting object sounds         | 2.45<br>(0.64)                                     | 2.57<br>(0.63)                                         | 2.65<br>(0.77)                                     | F(2) = 2.521,<br><i>p</i> = 0.082 | [0.00; 0.05]  | r =<br>0.38                    |
| 3) Short-lasting human sounds          | 3.22<br>(0.76)                                     | 3.41<br>(0.80)                                         | 3.27<br>(0.88)                                     | F(2) = 1.827,<br><i>p</i> = 0.162 | [0.00; 0.04]  | r =<br>0.32                    |
| 4) Continuous object sounds            | 2.15<br>(0.52)                                     | 2.14<br>(0.53)                                         | 2.28<br>(0.63)                                     | F(2) = 2.151,<br><i>p</i> = 0.118 | [0.00; 0.40]  | r =<br>0.10                    |
| 5) Continuous human sounds             | 2.31<br>(0.50)                                     | 2.40<br>(0.45)                                         | 2.31<br>(0.51)                                     | F(2) = 1.247,<br><i>p</i> = 0.289 | [0.00; 0.03]  | r =<br>0.10                    |

Comparison of sound perception for Switzerland, Germany, and Austria. Groups are presented as *mean* (*SD*=standard deviation) ranging from 1 (not disturbing at all) to 5 (very disturbing). Sound source group values were calculated based on the average of individual sound sources (see S4 Table). Abbreviations: mean (*M*); standard deviation (*SD*); confidence interval (*CI*).

<sup>a</sup> Perception of sound levels and groups 1 to 4, *n* = 349; group 5, *n* = 350

<sup>b</sup> Analysis of variances

<sup>c</sup> Pearson's *r*
