# Supplementary material for: Perceived sounds and their reported level of disturbance in intensive care units: A multinational survey among healthcare professionals
Source: PubMed Central journal article supplement (PMC9803129; doi:10.1371/journal.pone.0279603), 2022-12-30
Supplement: pone.0279603.s004.pdf [file pone.0279603.s004.pdf]

**Table S4. Full list of sound sources.**

| Sound sources                                 | % (n)       | <i>M</i> ± <i>SD</i> | Rank | Sound source group |
|-----------------------------------------------|-------------|----------------------|------|--------------------|
| <b>Medical Equipment/Procedures</b>           |             |                      |      |                    |
| Respirator                                    | 96.6% (338) | 3.11 (1.04)          | 7    | 1                  |
| Extracorporeal membrane oxygenation           | 32.9% (155) | 2.65 (1.13)          | 18   | 1                  |
| Vital signs monitor/alarms                    | 97.7% (342) | 3.73 (1.00)          | 1    | 1                  |
| Dialysis                                      | 89.4% (313) | 3.24 (1.08)          | 4    | 1                  |
| Feeding Pump                                  | 98.3% (344) | 2.47 (1.11)          | 23   | 1                  |
| Perfusors/Syringe pumps                       | 98.6% (345) | 2.99 (1.22)          | 10   | 1                  |
| Suction devices (e.g., intratracheal, oral)   | 98.0% (343) | 2.59 (1.11)          | 20   | 1                  |
| Compressed air/ Wall connections              | 99.1% (347) | 2.04 (1.07)          | 40   | 1                  |
| Drainage/Thoracic drainage                    | 98.6% (345) | 1.97 (1.01)          | 44   | 1                  |
| Vacuum assisted closure-therapy pumps         | 96.9% (339) | 2.19 (1.02)          | 34   | 1                  |
| Warming blanket                               | 97.1% (340) | 2.37 (1.16)          | 29   | 1                  |
| <b>Routine procedures</b>                     |             |                      |      |                    |
| Ward round                                    | 100% (350)  | 2.65 (1.06)          | 17   | 5                  |
| Change of shift reports                       | 99.4% (348) | 2.96 (1.04)          | 11   | 5                  |
| Cardiopulmonary resuscitation                 | 97.7% (342) | 2.68 (1.22)          | 16   | 5                  |
| Intubation                                    | 96.9% (339) | 2.07 (0.87)          | 38   | 5                  |
| Complaining/moaning patients                  | 97.4% (341) | 3.49 (1.14)          | 3    | 3                  |
| Patient's admission/takeover                  | 98.6% (345) | 2.42 (0.91)          | 26   | 5                  |
| Planned patient's admission                   | 96.3% (337) | 1.99 (0.70)          | 42   | 5                  |
| Patient's transfer                            | 98.0% (343) | 1.98 (0.66)          | 43   | 5                  |
| External consultation (specialized physician) | 97.7% (342) | 1.93 (0.71)          | 46   | 5                  |
| Daily nursing care                            | 98.3% (344) | 2.04 (0.76)          | 41   | 5                  |
| Visits from relatives                         | 97.7% (342) | 2.41 (0.94)          | 27   | 5                  |
| Food distribution                             | 94.6% (331) | 1.80 (0.74)          | 50   | 4                  |
| Cleaning ward                                 | 98.9% (346) | 2.39 (1.13)          | 28   | 4                  |
| <b>Communication</b>                          |             |                      |      |                    |
| Private conversations between employees       | 98.6% (345) | 3.07 (0.94)          | 8    | 5                  |

|                                                                  |             |             |    |   |
|------------------------------------------------------------------|-------------|-------------|----|---|
| Patient-related conversations between employees                  | 98.3% (344) | 2.21 (0.83) | 33 | 5 |
| Communication with patients                                      | 96.6% (338) | 2.07 (0.85) | 39 | 5 |
| Employee's breaks                                                | 97.7% (342) | 2.13 (1.03) | 36 | 5 |
| Laughs                                                           | 97.7% (342) | 2.76 (1.10) | 15 | 3 |
| Calls over long distances                                        | 97.1% (340) | 3.64 (1.13) | 2  | 3 |
| <b>Ambient sounds</b>                                            |             |             |    |   |
| Opening packages                                                 | 99.4% (348) | 3.17 (1.18) | 6  | 2 |
| Opening and closing doors                                        | 96.6% (338) | 2.47 (1.14) | 24 | 2 |
| Opening and closing drawers                                      | 98.3% (344) | 2.47 (1.05) | 22 | 2 |
| Moving material trolley                                          | 97.7% (342) | 2.59 (1.01) | 19 |   |
| Laundry trolleys/laundry boxes                                   | 96.9% (339) | 2.27 (1.03) | 31 | 4 |
| Operating the bed brake                                          | 99.1% (347) | 2.12 (1.02) | 37 | 2 |
| Adjusting the bed rail                                           | 98.6% (345) | 2.24 (1.03) | 32 | 2 |
| Adjusting the bed height                                         | 97.4% (341) | 1.82 (0.83) | 48 | 4 |
| Faucet/water sounds                                              | 96.3% (337) | 1.82 (0.82) | 49 | 2 |
| Putting on and taking off protective clothing (including gloves) | 98.9% (346) | 1.91 (0.89) | 47 | 4 |
| Pushing wheelchair                                               | 88.9% (311) | 1.80 (0.83) | 51 | 4 |
| Opening and closing curtains                                     | 85.4% (299) | 1.74 (0.88) | 52 | 2 |
| Change garbage bags                                              | 97.4% (341) | 2.79 (1.21) | 14 | 4 |
| Shoes (squeaky or loud soles)                                    | 99.1% (347) | 2.55 (1.08) | 21 | 2 |
| Pager                                                            | 81.7% (286) | 2.82 (1.22) | 13 | 2 |
| Call/bell from patient                                           | 96.0% (336) | 2.85 (1.10) | 12 | 2 |
| Call/bell visit announcement                                     | 96.6% (338) | 3.01 (1.17) | 9  | 2 |
| Cell phones not muted                                            | 95.1% (333) | 3.22 (1.34) | 5  | 2 |
| Coffee machine                                                   | 94.0% (329) | 1.94 (1.03) | 45 | 4 |
| Music/radio/television                                           | 96.6% (338) | 2.43 (1.13) | 25 | 4 |
| Air conditioning/ventilation equipment                           | 94.9% (332) | 2.31 (1.19) | 30 | 4 |
| Sounds from outside (ambulance, helicopter, noisy street)        | 97.1% (340) | 2.16 (1.04) | 35 | 4 |

List of all 52 sound sources queried in the online survey. The data are presented as % ( $n$ ), where  $n$  represents the number of participants and percentages were calculated according to  $n = 350$ . Sound sources are presented as means and standard deviations ranging from 1 (not disturbing at all) to 5 (very disturbing). Rank represents the rating indicating their order of disturbance (where 1 is most disturbing

and 52 is least disturbing). Rank was determined first by the level of the mean and second by the level of the standard deviation. Sound source groups are those used for statistical analyses and presented in S3 Table, namely 1) Devices and their alarms, 2) Short-lasting object sounds, 3) Short-lasting human sounds 4) Continuous object sounds, 5) Continuous human sounds). Abbreviations: mean (M); standard deviation (SD).
